# Supplementary material
Source: publisher site journal article supplement (https://www.dovepress.com/article/230348)
Supplement: Supplementary file 1 [file get_supplementary_file.php]

**Table S1**The In-silico prediction data for *MTHFR* 677C>T rs1801133 and *MTHFR* 1298A>C rs1801131 SNPs.

| **SNP ID** | **Amino acid position** | **Prediction** | | | | **Splicing**  **ESS/ESE** | | | **miRNA binding sites** |
| --- | --- | --- | --- | --- | --- | --- | --- | --- | --- |
| **SIFT** | **Align GVGD** | **Mutation Taster** | **PolyPhen2** | **Human splicing finder** | | **ESE finder** | **MiR base** |
| rs1801133  *MTHFR*  677C>T | p.A222V | Deleterious | Highly likely damage (C55) | Disease causing | Probably damaging | Alteration of an exonic ESE site (sites broken); no effect on splicing | ESE sites broken | | Loss of 2 miRNA binding sites |
| rs1801131  *MTHFR*  1298A>C | p.E429A  or A1298C | Tolerate | Most likely C65 | Disease causing | Possibly damaging | Creation of an exonic ESS site;  loss of 5 ESE site; new acceptor site | Minor effect | | Loss of 8 miRNA binding sites |
